# Supplementary material
Source: PubMed Central journal article supplement (PMC4443952)
Supplement: npp2014183x1.pdf [file npp2014183x1.pdf]

## Supplementary Tables and Figures

**Table S1** Region of Interest Analyses for Effects of Oxytocin on Left and Right Amygdala Activity. Analysis of Variance on the Emotion-Induced Signal Increase (Emotion – Neutral) as a Function of Emotional Valence (Angry, Happy), Stimulus Duration (17, 68 ms), Attentional Focus (Eyes, Mouth), and Drug (Placebo, Oxytocin)

|                                   | Left amygdala |              | Right amygdala |              |
|-----------------------------------|---------------|--------------|----------------|--------------|
|                                   | F-value       | Significance | F-value        | Significance |
| <i>Main Effects</i>               |               |              |                |              |
| Focus (Eyes vs. Mouth)            | .031          | .861         | .683           | .413         |
| Emotion (Angry vs. Happy)         | .025          | .874         | .157           | .694         |
| Duration (17 ms vs. 68 ms)        | .842          | .364         | .143           | .707         |
| Drug (Placebo vs. Oxytocin)       | .919          | .343         | .604           | .441         |
| <i>Interaction Effects</i>        |               |              |                |              |
| Focus * Drug                      | 1.179         | .283         | .000           | .997         |
| Emotion * Drug                    | .395          | .533         | .048           | .828         |
| Duration * Drug                   | .009          | .924         | .405           | .528         |
| Focus * Emotion                   | .012          | .912         | .137           | .713         |
| Focus * Duration                  | .368          | .547         | .326           | .571         |
| Emotion * duration                | .050          | .824         | .183           | .671         |
| Focus * Emotion * Drug            | 4.661         | .036         | 12.944         | .001         |
| Focus * Duration * Drug           | .081          | .778         | .476           | .494         |
| Emotion * Duration * Drug         | .139          | .711         | .068           | .795         |
| Focus * Emotion * Duration        | 1.127         | .294         | .343           | .561         |
| Focus * Emotion * Duration * Drug | .659          | .421         | .707           | .405         |



**Figure S2** Reactivity of left and right amygdala to masked angry (upper graphs) and happy (lower graphs) faces for the short duration condition (17 ms). Percent signal change within the left and right amygdala ROI as a function of emotional valence, attentional focus and drug condition. For angry faces, oxytocin reduced amygdala responses when attending to the eye region. For happy faces, oxytocin decreased amygdala responses when attending to the mouth region. Error bars represent the standard error of the mean.



**Figure S3** Reactivity of left and right amygdala to masked angry (upper graphs) and happy (lower graphs) faces for the long duration condition (68 ms). Percent signal change within the left and right amygdala ROI as a function of emotional valence, attentional focus and drug condition. For angry faces, oxytocin reduced amygdala responses when attending to the eye region. For happy faces, oxytocin decreased amygdala responses when attending to the mouth region. Error bars represent the standard error of the mean.

**Table S4** Whole Brain Analysis for the Effects of Oxytocin on Brain Responses when Attending to the Eye Region or to the Mouth Region of Masked Angry Faces (contrast: angry > neutral;  $p < .001$ ,  $k \geq 10$ )

| Cluster region                                      | k    | Z    | MNI coordinates |     |     |
|-----------------------------------------------------|------|------|-----------------|-----|-----|
|                                                     |      |      | x               | y   | z   |
| <i>EYES</i>                                         |      |      |                 |     |     |
| <i>Placebo</i>                                      |      |      |                 |     |     |
| L Fusiform Gyrus / Inferior Temporal Gyrus          | 1108 | 6.76 | -42             | -61 | -17 |
| R Inferior Temporal Gyrus/ Inferior Occipital Gyrus | 633  | 5.41 | 45              | -40 | -17 |
| L Cerebellum                                        | 51   | 4.27 | -21             | -76 | -41 |
| L Olfactory Cortex                                  | 33   | 4.18 | -21             | 11  | -17 |
| R Superior Occipital Gyrus                          | 92   | 4.00 | 27              | -79 | 34  |
| R Olfactory Cortex                                  | 18   | 3.86 | 18              | 11  | -14 |
| L Mid-Temporal Gyrus                                | 30   | 3.71 | -54             | -52 | 7   |
| R Inferior Frontal Gyrus                            | 17   | 3.66 | 54              | 38  | 1   |
| L Inferior Parietal Cortex                          | 16   | 3.41 | -60             | -46 | 46  |
| <i>Oxytocin</i>                                     |      |      |                 |     |     |
| No significant cluster                              |      |      |                 |     |     |
| <i>Placebo &gt; Oxytocin</i>                        |      |      |                 |     |     |
| L Fusiform Gyrus                                    | 330  | 4.69 | -42             | -82 | -14 |
| L Cerebellum                                        | 16   | 3.93 | -24             | -76 | -41 |
| L Midbrain / Thalamus                               | 29   | 3.93 | -9              | -13 | -11 |
| L Hippocampus / Thalamus                            | 44   | 3.93 | -18             | -31 | -2  |
| R Thalamus                                          | 14   | 3.85 | 12              | -16 | 13  |
| L Mid-Frontal Gyrus                                 | 24   | 3.84 | -39             | 59  | 19  |
| Striate Cortex                                      | 39   | 3.83 | 0               | -73 | 4   |
| L Fusiform Gyrus / Cerebellum                       | 16   | 3.64 | -24             | -31 | -23 |
| L Midbrain                                          | 14   | 3.63 | -3              | -22 | -20 |
| R Inferior Parietal Cortex                          | 41   | 3.63 | 48              | -55 | 49  |
| R Caudate                                           | 25   | 3.58 | 9               | 14  | 7   |
| L Mid-Frontal Gyrus                                 | 20   | 3.56 | -54             | 17  | 40  |
| R Inferior Frontal Gyrus                            | 19   | 3.55 | 60              | 14  | 19  |
| R Mid-Frontal Gyrus                                 | 16   | 3.51 | 51              | 44  | 19  |
| R Cerebellum                                        | 46   | 3.51 | 21              | -67 | -17 |
| <i>Oxytocin &gt; Placebo</i>                        |      |      |                 |     |     |
| No significant cluster                              |      |      |                 |     |     |
| <i>MOUTH</i>                                        |      |      |                 |     |     |
| <i>Placebo</i>                                      |      |      |                 |     |     |
| R Inferior Temporal Gyrus / Fusiform Gyrus          | 68   | 4.67 | 45              | -49 | -17 |
| L Caudate                                           | 16   | 4.02 | -9              | 8   | 10  |
| <i>Oxytocin</i>                                     |      |      |                 |     |     |
| R Inferior Occipital Gyrus                          | 117  | 4.56 | 48              | -70 | -5  |
| L Superior Occipital Gyrus                          | 113  | 4.19 | -24             | -91 | 31  |
| L Fusiform Gyrus                                    | 29   | 3.95 | -42             | -52 | -17 |
| R Superior Occipital Gyrus                          | 44   | 3.89 | 24              | -82 | 43  |
| L Inferior Occipital Gyrus                          | 14   | 3.81 | -48             | -73 | -2  |
| R Mid-Occipital Gyrus                               | 15   | 3.76 | 36              | -91 | 13  |
| L Lateral Orbitofrontal Cortex                      | 25   | 3.68 | -33             | 26  | -14 |
| L Lingual Gyrus                                     | 57   | 3.68 | -15             | -67 | -8  |
| R Superior Occipital Gyrus                          | 11   | 3.63 | 21              | -94 | 28  |
| R Amygdala                                          | 13   | 3.61 | 27              | -1  | -23 |
| L Mid-Temporal Gyrus                                | 10   | 3.45 | -54             | -73 | 13  |
| <i>Placebo &gt; Oxytocin</i>                        |      |      |                 |     |     |
| No significant cluster                              |      |      |                 |     |     |
| <i>Oxytocin &gt; Placebo</i>                        |      |      |                 |     |     |
| L Temporal Pole                                     | 11   | 3.44 | -51             | 14  | -20 |

**Table S5** Whole Brain Analysis for Differential Effects of Oxytocin on Brain Responses when Attending to the Eye as Compared to the Mouth Region of Masked Angry Faces or Vice Versa (contrast: angry > neutral;  $p < .001$ ,  $k \geq 10$ )

| Cluster region                              | k   | Z    | MNI coordinates |      |     |
|---------------------------------------------|-----|------|-----------------|------|-----|
|                                             |     |      | x               | y    | z   |
| <i>EYES &gt; MOUTH</i>                      |     |      |                 |      |     |
| <i>Placebo</i>                              |     |      |                 |      |     |
| L Fusiform Gyrus / Inferior Occipital Gyrus | 150 | 4.65 | -45             | -67  | -17 |
| L Medial Orbitofrontal Cortex               | 11  | 3.80 | -18             | 23   | -17 |
| L Inferior Temporal Gyrus                   | 16  | 3.64 | -45             | -19  | -32 |
| L Mid-Temporal Gyrus                        | 11  | 3.45 | -51             | -19  | -8  |
| <i>Oxytocin</i>                             |     |      |                 |      |     |
| No significant cluster                      |     |      |                 |      |     |
| <i>Placebo &gt; Oxytocin</i>                |     |      |                 |      |     |
| L Fusiform Gyrus / Inferior Occipital Gyrus | 31  | 4.48 | -45             | -67  | -14 |
| R Fusiform                                  | 5   | 4.33 | 30              | -61  | -2  |
| L Cerebellum                                | 78  | 4.17 | -24             | -76  | -41 |
| L Medial Orbitofrontal Cortex               | 23  | 4.17 | -24             | -76  | -41 |
| L Medial Orbitofrontal Cortex               | 11  | 3.94 | -18             | 23   | -14 |
| L Midbrain                                  | 13  | 3.92 | -9              | -16  | -11 |
| L Superior Occipital Gyrus                  | 63  | 3.92 | -18             | -85  | 37  |
| L Inferior Temporal Gyrus                   | 32  | 3.85 | -45             | -13  | -29 |
| L Mid-Temporal Gyrus                        | 15  | 3.69 | -42             | 2    | -26 |
| R Cuneus                                    | 90  | 3.68 | 9               | -82  | 40  |
| Striate Cortex                              | 23  | 3.65 | 9               | -64  | 4   |
| R Cerebellum                                | 14  | 3.58 | -48             | 44   | 19  |
| L Inferior Frontal Gyrus                    | 10  | 3.45 | -39             | 26   | 28  |
| R Cerebellum                                | 22  | 3.40 | 45              | -49  | -41 |
| L Mid-Temporal Gyrus                        | 10  | 3.37 | -48             | -19  | -11 |
| <i>MOUTH &gt; EYES</i>                      |     |      |                 |      |     |
| <i>Placebo</i>                              |     |      |                 |      |     |
| No significant cluster                      |     |      |                 |      |     |
| <i>Oxytocin</i>                             |     |      |                 |      |     |
| L Mid-Occipital Gyrus                       | 16  | 3.55 | -21             | -100 | 4   |
| <i>Placebo &gt; Oxytocin</i>                |     |      |                 |      |     |
| No significant cluster                      |     |      |                 |      |     |

**Table S6** Whole Brain Analysis for the Effects of Oxytocin on Brain Responses when Attending to the Eye Region or to the Mouth Region of Masked Happy Faces (contrast: happy > neutral;  $p < .001$ ,  $k \geq 10$ )

| Cluster region                                   | k   | Z    | MNI coordinates |      |     |
|--------------------------------------------------|-----|------|-----------------|------|-----|
|                                                  |     |      | x               | y    | z   |
| <i>EYES</i>                                      |     |      |                 |      |     |
| <i>Placebo</i>                                   |     |      |                 |      |     |
| L Inferior Temporal Gyrus / Fusiform Gyrus       | 65  | 4.57 | -51             | -52  | -20 |
| R Inferior Occipital Gyrus                       | 134 | 4.37 | 45              | -76  | -14 |
| R Inferior Temporal Gyrus / Fusiform Gyrus       | 16  | 4.10 | 48              | -43  | -20 |
| L Mid- / Superior Occipital Gyrus                | 28  | 3.59 | -27             | -79  | 31  |
| L Inferior Frontal Gyrus                         | 17  | 3.58 | -42             | 32   | 13  |
| R Superior Occipital Gyrus                       | 10  | 3.54 | 27              | -79  | 37  |
| <i>Oxytocin</i>                                  |     |      |                 |      |     |
| L Mid/Superior Occipital Gyrus                   | 379 | 4.92 | -33             | -79  | 16  |
| R Mid-Temporal Gyrus                             | 186 | 4.46 | 54              | -58  | 10  |
| R Inferior Occipital Gyrus / Fusiform Gyrus      | 45  | 4.42 | 45              | -73  | -11 |
| R Inferior Temporal Gyrus / Fusiform Gyrus       | 44  | 4.31 | 45              | -49  | -17 |
| R Postcentral Lobule                             | 37  | 3.96 | 24              | -28  | 61  |
| L Fusiform / Lingual Gyrus                       | 48  | 3.88 | -27             | -67  | -11 |
| L Inferior Temporal Gyrus                        | 32  | 3.84 | -60             | -46  | -14 |
| Striate Cortex                                   | 74  | 3.78 | -3              | -100 | 16  |
| L Hippocampus / Amygdala                         | 11  | 3.72 | -33             | -1   | -17 |
| L Putamen                                        | 14  | 3.70 | -24             | 14   | -8  |
| L Lingual Gyrus / Striate Cortex                 | 15  | 3.70 | -9              | -79  | -11 |
| L Precuneus                                      | 10  | 3.60 | -3              | -46  | 52  |
| L Postcentral Lobule                             | 12  | 3.58 | -42             | -13  | 34  |
| R Superior Occipital Gyrus                       | 22  | 3.49 | 24              | -76  | 34  |
| R Hippocampus                                    | 10  | 3.32 | 24              | -10  | -17 |
| <i>Placebo &gt; Oxytocin</i>                     |     |      |                 |      |     |
| No significant cluster                           |     |      |                 |      |     |
| <i>Oxytocin &gt; Placebo</i>                     |     |      |                 |      |     |
| No significant cluster                           |     |      |                 |      |     |
| <i>MOUTH</i>                                     |     |      |                 |      |     |
| <i>Placebo</i>                                   |     |      |                 |      |     |
| L Fusiform Gyrus                                 | 66  | 4.57 | -36             | -55  | -17 |
| L Fusiform Gyrus / Lingual Gyrus                 | 61  | 4.51 | -27             | -73  | -8  |
| L Insula                                         | 44  | 4.34 | -27             | 23   | -11 |
| R Insula                                         | 59  | 4.31 | 27              | 20   | -17 |
| Superior Medial Frontal Gyrus                    | 77  | 4.30 | 0               | 50   | 37  |
| L Hippocampus                                    | 58  | 4.22 | -24             | -10  | -14 |
| R Inferior Occipital Gyrus / Fusiform Gyrus      | 39  | 4.11 | 42              | -64  | -14 |
| L Mid-Occipital Gyrus                            | 58  | 3.96 | -24             | -79  | 16  |
| R Amygdala                                       | 16  | 3.88 | 30              | -1   | -23 |
| R Mid-Occipital Gyrus                            | 33  | 3.84 | 24              | -97  | 10  |
| R Precentral Lobule                              | 21  | 3.82 | 33              | -25  | 58  |
| L Inferior Parietal Cortex / Mid-Occipital Gyrus | 39  | 3.49 | -30             | -76  | 43  |
| R Fusiform Gyrus                                 | 10  | 3.46 | 39              | -40  | -20 |
| R Superior Occipital Gyrus                       | 21  | 3.37 | 24              | -82  | 37  |
| <i>Oxytocin</i>                                  |     |      |                 |      |     |
| L Fusiform Gyrus / Lingual Gyrus                 | 75  | 4.33 | -24             | -76  | -11 |
| L Mid- / Inferior Occipital Gyrus                | 16  | 3.69 | -51             | -79  | -2  |
| <i>Placebo &gt; Oxytocin</i>                     |     |      |                 |      |     |
| L Insula                                         | 25  | 4.21 | -27             | 23   | -11 |
| Superior Medial Frontal Gyrus                    | 30  | 3.73 | 0               | 50   | 37  |
| <i>Oxytocin &gt; Placebo</i>                     |     |      |                 |      |     |
| No significant cluster                           |     |      |                 |      |     |

**Table S7** Whole Brain Analysis for Differential Effects of Oxytocin on Brain Responses when Attending to the Eye as Compared to the Mouth Region of Masked Happy Faces or Vice Versa (contrast: happy > neutral;  $p < .001$ ,  $k \geq 10$ )

| Cluster region                          | k  | Z    | MNI coordinates |     |     |
|-----------------------------------------|----|------|-----------------|-----|-----|
|                                         |    |      | x               | y   | z   |
| <i>EYES &gt; MOUTH</i>                  |    |      |                 |     |     |
| <i>Placebo</i>                          |    |      |                 |     |     |
| No significant cluster                  |    |      |                 |     |     |
| <i>Oxytocin</i>                         |    |      |                 |     |     |
| R Precentral Lobule                     | 11 | 3.74 | 33              | -22 | 61  |
| Striate Cortex                          | 17 | 3.63 | 3               | -91 | 4   |
| R Primary Auditory Cortex               | 11 | 3.53 | 39              | -22 | 16  |
| <i>Placebo &gt; Oxytocin</i>            |    |      |                 |     |     |
| No significant cluster                  |    |      |                 |     |     |
| <i>MOUTH &gt; EYES</i>                  |    |      |                 |     |     |
| <i>Placebo</i>                          |    |      |                 |     |     |
| R Parahippocampal Gyrus / Lingual Gyrus | 16 | 4.14 | 18              | -40 | -5  |
| <i>Oxytocin</i>                         |    |      |                 |     |     |
| No significant cluster                  |    |      |                 |     |     |
| <i>Placebo &gt; Oxytocin</i>            |    |      |                 |     |     |
| L Pallidum                              | 35 | 4.49 | -18             | -1  | 1   |
| R Inferior Temporal Gyrus               | 16 | 4.02 | 54              | -25 | -20 |
| L Putamen                               | 13 | 3.86 | -24             | 20  | -2  |
| R Superior Medial Frontal Gyrus         | 17 | 3.79 | 3               | 50  | 40  |
| R Hippocampus                           | 11 | 3.67 | 21              | -22 | -11 |
| R Superior Frontal Gyrus                | 12 | 3.62 | 18              | 41  | 34  |

**Table S8** Whole Brain Analysis for Differential Effects of Oxytocin on Brain Responses when Attending to the Eye as Compared to the Mouth Region of Masked Angry Faces or Vice Versa (contrast: angry > neutral;  $p < .001$ ,  $k \geq 10$ ) for the Brief Stimulus Duration Condition (17 ms)

| Cluster region                         | k   | Z    | MNI coordinates |     |     |
|----------------------------------------|-----|------|-----------------|-----|-----|
|                                        |     |      | x               | y   | z   |
| <i>EYES &gt; MOUTH</i>                 |     |      |                 |     |     |
| <i>Placebo</i>                         |     |      |                 |     |     |
| R Fusiform Gyrus                       | 19  | 4.32 | 36              | -4  | -29 |
| L Cerebellum                           | 71  | 4.27 | -42             | -79 | -44 |
| L Inferior Temporal / Fusiform Gyrus   | 45  | 3.99 | -36             | -4  | -32 |
| R Inferior Temporal Gyrus              | 12  | 3.89 | 51              | -19 | -26 |
| L Medial Orbitofrontal Cortex          | 10  | 3.73 | -12             | 35  | -20 |
| <i>Oxytocin</i>                        |     |      |                 |     |     |
| No significant cluster                 |     |      |                 |     |     |
| <i>Placebo &gt; Oxytocin</i>           |     |      |                 |     |     |
| R Inferior Temporal Gyrus              | 15  | 4.50 | 51              | -19 | -26 |
| L Mid-Occipital Gyrus / Fusiform Gyrus | 225 | 4.22 | -36             | -91 | 1   |
| L Cerebellum                           | 103 | 4.21 | -42             | -76 | -44 |
| L Mid-Temporal Gyrus                   | 16  | 4.21 | -39             | 2   | -29 |
| R Fusiform Gyrus                       | 40  | 4.09 | 30              | -79 | 1   |
| R Medial Orbitofrontal Cortex          | 19  | 4.06 | 15              | 44  | -14 |
| R Hippocampus                          | 25  | 3.85 | 15              | -7  | -11 |
| L Orbitofrontal Cortex                 | 10  | 3.84 | -18             | 23  | -14 |
| R Midbrain                             | 25  | 3.76 | 3               | -25 | -20 |
| L Inferior Temporal / Fusiform Gyrus   | 26  | 3.70 | -36             | -16 | -32 |
| R Cerebellum                           | 24  | 3.68 | 39              | -73 | -41 |
| L Mid-Frontal Gyrus                    | 10  | 3.63 | -51             | 41  | 19  |
| L Hippocampus / Amygdala               | 11  | 3.63 | -15             | -4  | -14 |
| R Angular Gyrus                        | 15  | 3.48 | 51              | -58 | 52  |
| L Superior Occipital Gyrus             | 15  | 3.45 | -24             | -88 | 37  |
| Striate Cortex                         | 11  | 3.34 | -6              | -88 | -8  |
| <i>MOUTH &gt; EYES</i>                 |     |      |                 |     |     |
| <i>Placebo</i>                         |     |      |                 |     |     |
| No significant cluster                 |     |      |                 |     |     |
| <i>Oxytocin</i>                        |     |      |                 |     |     |
| L Inferior / Mid-Occipital Gyrus       | 209 | 4.58 | -24             | -94 | 4   |
| R Superior Occipital Gyrus             | 14  | 4.02 | 24              | -82 | 4   |
| L Inferior Frontal Gyrus               | 20  | 3.93 | -48             | 11  | 13  |
| L Mid-Frontal Gyrus                    | 35  | 3.87 | -42             | 53  | 13  |
| Midbrain                               | 18  | 3.87 | -12             | -16 | -14 |
| L Thalamus                             | 21  | 3.86 | -18             | -4  | 13  |
| L Pallidum                             | 13  | 3.82 | -18             | -1  | -8  |
| R Inferior Occipital Gyrus             | 34  | 3.78 | 39              | -76 | -8  |
| R Hippocampus                          | 11  | 3.66 | 15              | -7  | -11 |
| R Putamen / Caudate                    | 13  | 3.60 | 18              | 11  | 4   |
| R Inferior Frontal Gyrus               | 15  | 3.40 | 42              | 26  | 19  |
| <i>Placebo &gt; Oxytocin</i>           |     |      |                 |     |     |
| No significant cluster                 |     |      |                 |     |     |

**Table S9** Whole Brain Analysis for Differential Effects of Oxytocin on Brain Responses when Attending to the Eye as Compared to the Mouth Region of Masked Angry Faces or Vice Versa (contrast: angry > neutral;  $p < .001$ ,  $k \geq 10$ ) for the Long Stimulus Duration Condition (68 ms)

| Cluster region                              | k   | Z    | MNI coordinates |     |     |
|---------------------------------------------|-----|------|-----------------|-----|-----|
|                                             |     |      | x               | y   | z   |
| <i>EYES &gt; MOUTH</i>                      |     |      |                 |     |     |
| <i>Placebo</i>                              |     |      |                 |     |     |
| L Fusiform Gyrus / Inferior Occipital Gyrus | 86  | 4.17 | -45             | -67 | -17 |
| Paracentral Lobule                          | 35  | 4.12 | 0               | -19 | 73  |
| R Supplementary Motor Area                  | 21  | 3.82 | 9               | 5   | 64  |
| L Rolandic Operculum                        | 19  | 3.62 | -63             | 2   | 13  |
| <i>Oxytocin</i>                             |     |      |                 |     |     |
| No significant cluster                      |     |      |                 |     |     |
| <i>Placebo &gt; Oxytocin</i>                |     |      |                 |     |     |
| L Mid-Temporal Gyrus                        | 20  | 4.23 | -57             | -70 | 10  |
| R Cuneus / Striate Cortex                   | 115 | 4.03 | 6               | -79 | 37  |
| Superior Colliculi                          | 15  | 3.95 | 6               | -28 | -8  |
| L Rolandic Operculum                        | 47  | 3.89 | -60             | 2   | 13  |
| L Inferior Frontal Gyrus                    | 20  | 3.87 | -42             | 23  | 31  |
| Paracentral Lobule                          | 25  | 3.82 | 0               | -22 | 73  |
| L Superior Occipital Gyrus                  | 34  | 3.71 | -6              | -82 | 46  |
| L Fusiform Gyrus                            | 35  | 3.63 | -45             | -67 | -17 |
| R Precuneus                                 | 14  | 3.51 | 3               | -61 | 64  |
| <i>MOUTH &gt; EYES</i>                      |     |      |                 |     |     |
| <i>Placebo</i>                              |     |      |                 |     |     |
| No significant cluster                      |     |      |                 |     |     |
| <i>Oxytocin</i>                             |     |      |                 |     |     |
| R Mid-Frontal Gyrus                         | 22  | 3.86 | 45              | 32  | 34  |
| L Superior Frontal Gyrus                    | 17  | 3.75 | -18             | -1  | 73  |
| <i>Placebo &gt; Oxytocin</i>                |     |      |                 |     |     |
| No significant cluster                      |     |      |                 |     |     |

**Table S10** Effects of Intranasal Oxytocin on Detection of Masked Facial Emotions ( $d'$ ) as a Function of Emotional Valence (Angry, Happy), Stimulus Duration (17, 68 ms), and Attentional Focus (Eyes, Mouth)

|              | Placebo (n = 22) |     | Oxytocin (n = 21) |      | T      | df | p    |
|--------------|------------------|-----|-------------------|------|--------|----|------|
|              | M                | SD  | M                 | SD   |        |    |      |
| <i>Angry</i> |                  |     |                   |      |        |    |      |
| 17ms Eyes    | 1.02             | .86 | .97               | .94  | -.191  | 41 | .849 |
| 17ms Mouth   | 1.07             | .68 | .88               | .66  | -.941  | 41 | .352 |
| 68ms Eyes    | 3.27             | .88 | 2.90              | 1.13 | -1.214 | 41 | .232 |
| 68ms Mouth   | 2.89             | .97 | 2.59              | 1.12 | -.930  | 41 | .358 |
| <i>Happy</i> |                  |     |                   |      |        |    |      |
| 17ms Eyes    | 2.02             | .91 | 2.03              | .84  | .048   | 41 | .962 |
| 17ms Mouth   | 1.72             | .78 | 1.78              | .77  | .230   | 41 | .819 |
| 68ms Eyes    | 3.99             | .65 | 3.73              | 1.06 | -.982  | 41 | .332 |
| 68ms Mouth   | 3.87             | .70 | 3.82              | .96  | -.200  | 41 | .842 |

**Table S11** Effects of Intranasal Oxytocin on Response Latencies as a Function of Emotional Valence (Angry, Happy), Stimulus Duration (17, 68 ms), and Attentional Focus (Eyes, Mouth). Values Represent Reaction Time Differences (ms) Between Emotional and Neutral Face Trials with Positive Values Indicating Faster Responses to Emotional as Compared to Neutral Faces)

|              | <b>Placebo (n = 22)</b> |        | <b>Oxytocin (n = 21)</b> |        | T      | df | p    |
|--------------|-------------------------|--------|--------------------------|--------|--------|----|------|
|              | M                       | SD     | M                        | SD     |        |    |      |
| <i>Angry</i> |                         |        |                          |        |        |    |      |
| 17ms Eyes    | 70.46                   | 276.09 | 153.65                   | 140.97 | 1.235  | 41 | .224 |
| 17ms Mouth   | 122.48                  | 178.52 | 152.78                   | 157.85 | .589   | 41 | .559 |
| 68ms Eyes    | 178.67                  | 173.47 | 124.61                   | 280.14 | -.765  | 41 | .449 |
| 68ms Mouth   | 145.56                  | 173.27 | 160.13                   | 156.37 | .289   | 41 | .774 |
| <i>Happy</i> |                         |        |                          |        |        |    |      |
| 17ms Eyes    | 131.91                  | 176.15 | 197.37                   | 165.90 | 1.253  | 41 | .217 |
| 17ms Mouth   | 119.05                  | 162.38 | 150.48                   | 124.77 | .709   | 41 | .482 |
| 68ms Eyes    | 159.39                  | 117.04 | 97.32                    | 240.97 | -1.082 | 41 | .286 |
| 68ms Mouth   | 148.13                  | 109.25 | 129.77                   | 95.31  | -.586  | 41 | .561 |

**Table S12** Raw differences scores for percent signal change induced by emotional as compared to neutral masked faces within the left and right amygdala ROIs (e.g. [Angry Eyes 17 ms – Neutral Eyes 17 ms])

|                                 |       |  | <b>Left Amygdala</b> |          | <b>Right Amygdala</b> |          |
|---------------------------------|-------|--|----------------------|----------|-----------------------|----------|
|                                 |       |  | <b>T</b>             | <b>p</b> | <b>T</b>              | <b>p</b> |
| <i>Whole sample (df = 45)</i>   |       |  |                      |          |                       |          |
| Angry                           |       |  |                      |          |                       |          |
| Eyes                            | Short |  | 1.98                 | 0.05     | 2.45                  | .02      |
|                                 | Long  |  | 3.13                 | 0.00     | 1.90                  | .06      |
| Mouth                           | Short |  | 1.93                 | 0.06     | 1.60                  | .12      |
|                                 | Long  |  | 2.04                 | 0.05     | 2.50                  | .02      |
| Happy                           |       |  |                      |          |                       |          |
| Eyes                            | Short |  | 2.75                 | 0.01     | 1.51                  | .14      |
|                                 | Long  |  | 1.83                 | 0.07     | 1.71                  | .09      |
| Mouth                           | Short |  | 1.20                 | 0.23     | 2.18                  | .03      |
|                                 | Long  |  | 2.88                 | 0.01     | 2.03                  | .05      |
| <i>Placebo group (df = 22)</i>  |       |  |                      |          |                       |          |
| Angry                           |       |  |                      |          |                       |          |
| Eyes                            | Short |  | 2.44                 | .02      | 3.00                  | .01      |
|                                 | Long  |  | 3.65                 | .00      | 2.65                  | .02      |
| Mouth                           | Short |  | .44                  | .67      | .64                   | .53      |
|                                 | Long  |  | .90                  | .38      | 1.13                  | .27      |
| Happy                           |       |  |                      |          |                       |          |
| Eyes                            | Short |  | 1.68                 | .11      | .18                   | .86      |
|                                 | Long  |  | 1.50                 | .15      | .64                   | .53      |
| Mouth                           | Short |  | 1.51                 | .14      | 2.91                  | .01      |
|                                 | Long  |  | 2.21                 | .04      | 1.80                  | .09      |
| <i>Oxytocin group (df = 22)</i> |       |  |                      |          |                       |          |
| Angry                           |       |  |                      |          |                       |          |
| Eyes                            | Short |  | .28                  | .78      | .32                   | .75      |
|                                 | Long  |  | 1.15                 | .26      | .30                   | .77      |
| Mouth                           | Short |  | 2.25                 | .03      | 1.54                  | .14      |
|                                 | Long  |  | 2.11                 | .05      | 2.50                  | .02      |
| Happy                           |       |  |                      |          |                       |          |
| Eyes                            | Short |  | 2.25                 | .03      | 1.96                  | .06      |
|                                 | Long  |  | 1.05                 | .31      | 1.69                  | .11      |
| Mouth                           | Short |  | -.20                 | .85      | -.04                  | .97      |
|                                 | Long  |  | 1.82                 | .08      | 1.05                  | .30      |

**Table S13** Hit rates and false alarm rates for each condition in both substance groups

|              | Placebo (n = 22) |      |                  |      | Oxytocin (n = 21) |      |                  |      |
|--------------|------------------|------|------------------|------|-------------------|------|------------------|------|
|              | Hit rate         |      | False alarm rate |      | Hit rate          |      | False alarm rate |      |
|              | M                | SD   | M                | SD   | M                 | SD   | M                | SD   |
| <i>Angry</i> |                  |      |                  |      |                   |      |                  |      |
| 17ms Eyes    | 0.57             | 0.24 | 0.27             | 0.26 | 0.59              | 0.15 | 0.28             | 0.20 |
| 17ms Mouth   | 0.59             | 0.27 | 0.30             | 0.23 | 0.64              | 0.14 | 0.33             | 0.18 |
| 68ms Eyes    | 0.93             | 0.06 | 0.10             | 0.13 | 0.93              | 0.08 | 0.17             | 0.23 |
| 68ms Mouth   | 0.93             | 0.06 | 0.15             | 0.14 | 0.91              | 0.06 | 0.21             | 0.23 |
| <i>Happy</i> |                  |      |                  |      |                   |      |                  |      |
| 17ms Eyes    | 0.79             | 0.18 | 0.23             | 0.19 | 0.85              | 0.13 | 0.27             | 0.18 |
| 17ms Mouth   | 0.70             | 0.21 | 0.19             | 0.13 | 0.79              | 0.15 | 0.25             | 0.18 |
| 68ms Eyes    | 0.98             | 0.03 | 0.05             | 0.04 | 0.98              | 0.02 | 0.11             | 0.22 |
| 68ms Mouth   | 0.97             | 0.04 | 0.07             | 0.11 | 0.97              | 0.04 | 0.08             | 0.18 |

**Table S14** Response latencies (in ms) for each condition in both substance groups

|            | <b>Placebo (n = 22)</b> |        |                |        | <b>Oxytocin (n = 21)</b> |        |                |        |
|------------|-------------------------|--------|----------------|--------|--------------------------|--------|----------------|--------|
|            | <b>Angry</b>            |        | <b>Neutral</b> |        | <b>Angry</b>             |        | <b>Neutral</b> |        |
|            | M                       | SD     | M              | SD     | M                        | SD     | M              | SD     |
| 17ms Eyes  | 1011.61                 | 158.04 | 1082.07        | 306.32 | 1029.92                  | 200.89 | 1183.57        | 174.44 |
| 17ms Mouth | 1021.73                 | 211.54 | 1144.21        | 195.79 | 1031.70                  | 155.25 | 1184.48        | 177.63 |
| 68ms Eyes  | 904.39                  | 120.71 | 1083.06        | 167.24 | 870.42                   | 125.46 | 995.03         | 277.14 |
| 68ms Mouth | 909.75                  | 124.81 | 1055.31        | 169.59 | 881.14                   | 136.52 | 1041.27        | 158.78 |
|            | <b>Happy</b>            |        | <b>Neutral</b> |        | <b>Happy</b>             |        | <b>Neutral</b> |        |
|            | M                       | SD     | M              | SD     | M                        | SD     | M              | SD     |
|            | M                       | SD     | M              | SD     | M                        | SD     | M              | SD     |
| 17ms Eyes  | 942.82                  | 143.41 | 1074.73        | 186.05 | 887.95                   | 144.34 | 1085.32        | 192.94 |
| 17ms Mouth | 944.57                  | 159.91 | 1063.61        | 205.44 | 917.55                   | 150.76 | 1068.03        | 165.47 |
| 68ms Eyes  | 821.64                  | 133.42 | 981.03         | 120.85 | 787.88                   | 115.85 | 885.20         | 231.24 |
| 68ms Mouth | 816.11                  | 134.54 | 964.24         | 123.68 | 778.36                   | 133.21 | 908.13         | 116.03 |
